# Supplementary material
Source: PubMed Central journal article supplement (PMC3308740)
Supplement: supp_M111.296954_jbc.M111.296954-1.pdf [file supp_M111.296954_jbc.M111.296954-1.pdf]

## Supplemental Fig. S1

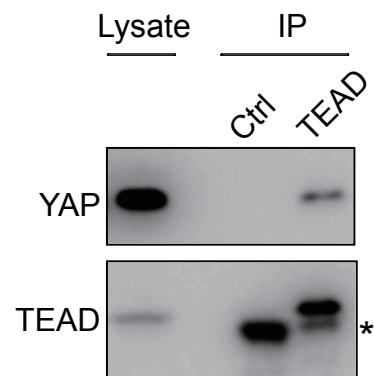

**Supplementary Fig. S1.** Co-immunoprecipitation of TEAD and YAP. TEAD was immunoprecipitated in KB cell lysates with control IgG or with anti-TEAD antibody. Co-immunoprecipitates were analyzed by immunoblot analysis with YAP and TEAD antibody. Asterisk indicates IgG heavy chain.

## Supplemental Fig. S2

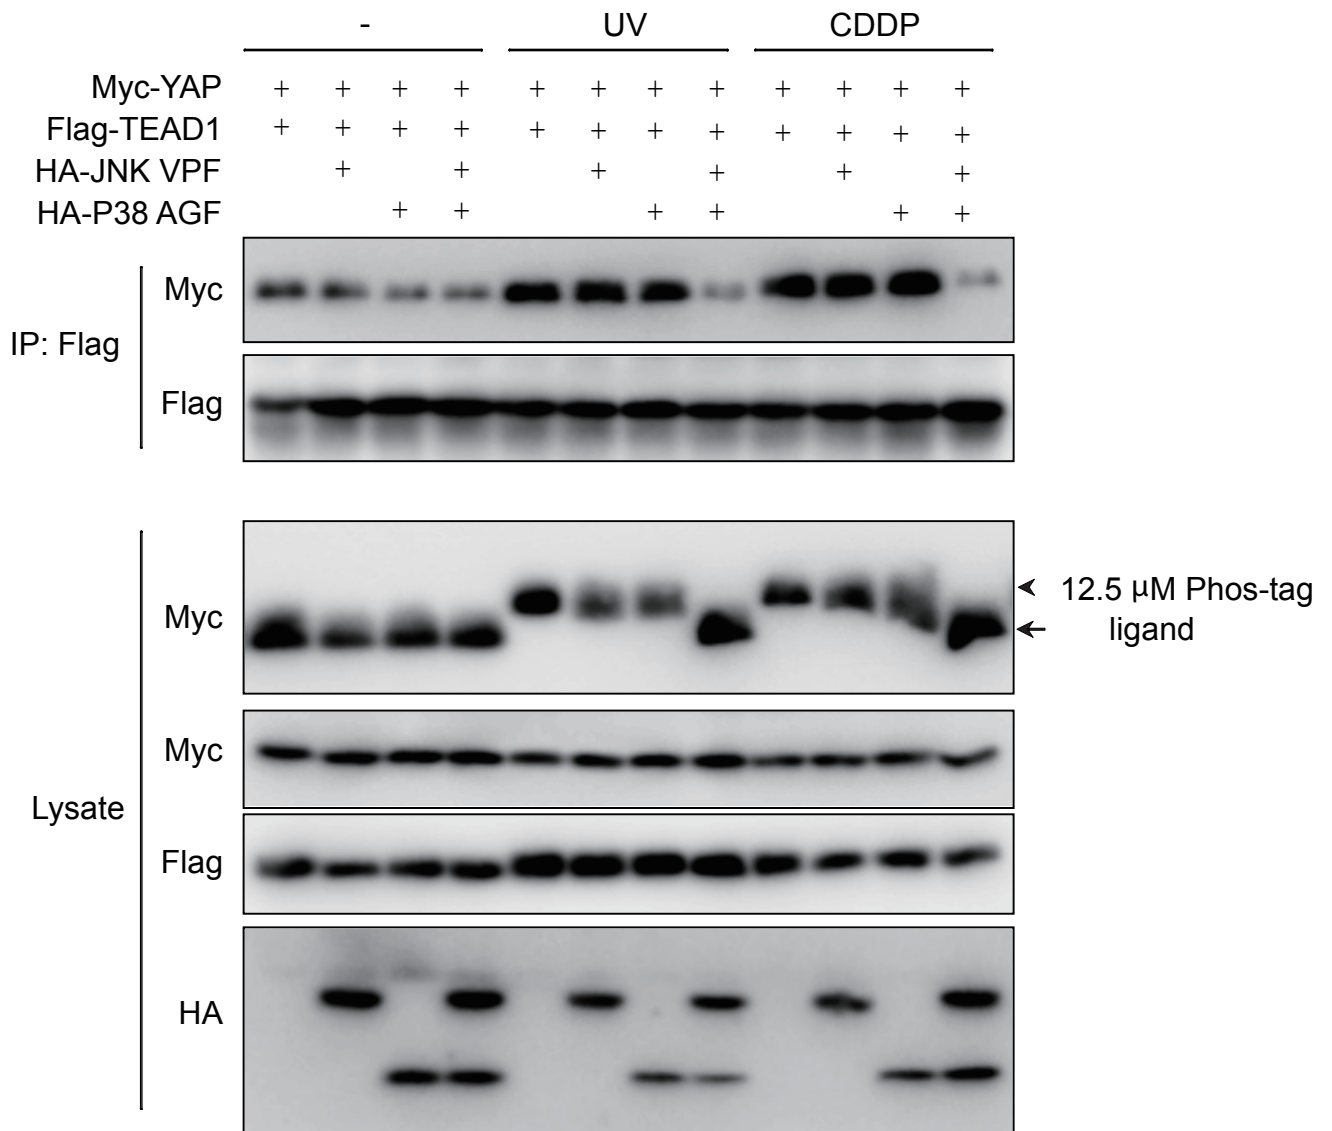

**Supplementary Fig. S2.** 293T cells were co-transfected with indicated constructs and UV-irradiated ( $100 \text{ J/m}^2$ ) or treated with CDDP ( $100 \mu\text{M}$ ) for 3 h. Cell lysates or immunoprecipitates with anti-Flag antibody were analyzed by immunoblot with indicated antibodies. Samples were resolved in a gel containing Phostag-ligand when indicated. The arrows indicate the position of YAP in untreated sample and arrowheads indicate YAP with slow mobility.

### Supplemental Fig. S3

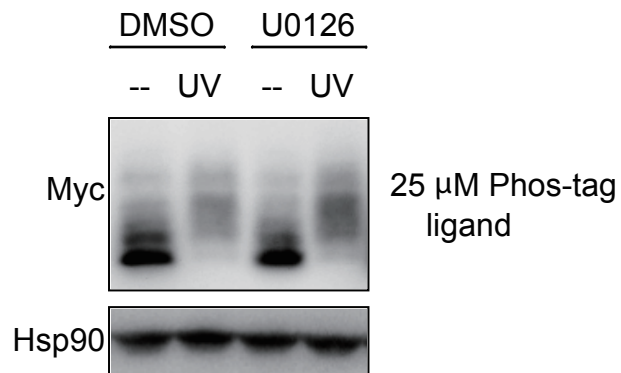

**Supplementary Fig. S3.** U2OS cells were transfected with Myc-YAP. Cells were pretreated with DMSO or U0126 (10  $\mu$ M) for 2 h and untreated or UV-irradiated (100 J/m<sup>2</sup>) for 30 min. Cell lysates were resolved on a gel containing 25  $\mu$ M of Phos-tag ligand and blotted with antibodies indicated

## Supplemental Fig. S4

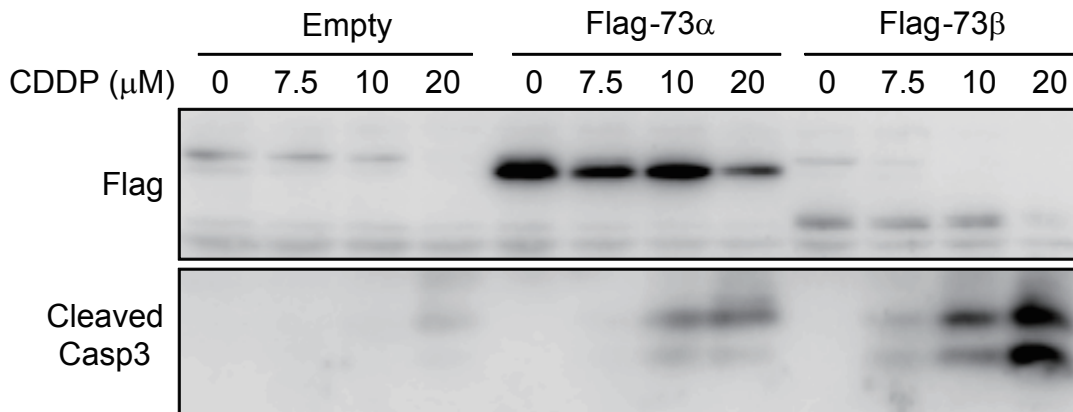

**Supplementary Fig. S4.** Restoration of p73 $\alpha/\beta$  in KB cells alters sensitivity to apoptosis. KB cells expressing p73 constructs were treated with CDDP for the periods indicated. Apoptosis was monitored by immunoblotting with a caspase 3 antibody specific for the cleaved form.
